# Supplementary material
Source: MDPI journal article supplement (https://www.mdpi.com/2073-4441/14/8/1260)
Supplement: s1 [file s1]

**Table S1.** Description of multi-source PPs used in this study.

| Datasets (short name)    | Spatial resolution | Temporal resolution | Period (used in this study) | Reference                            |
|--------------------------|--------------------|---------------------|-----------------------------|--------------------------------------|
| APHRODITE V1101, V1801R1 | 0.25°              | daily               | 1995-2013                   | (Yatagai <i>et al.</i> 2012) [49],   |
| CHIRPS V2.0              | 0.25°              | daily               | 1995-2013                   | (Funk <i>et al.</i> 2015) [50]       |
| CPC-Global               | 0.5°               | daily               | 1995-2013                   | (Xie <i>et al.</i> 2010) [51]        |
| GPCC V.2018 (V2)         | 1°                 | daily               | 1995-2013                   | (Schamm <i>et al.</i> 2014) [52]     |
| GPCP-1DD V1.2            | 1°                 | daily               | October 1996-2013           | (Huffman <i>et al.</i> 2001) [53]    |
| PERSIANN                 | 0.25°              | daily               | March 2000-2013             | (Sorooshian <i>et al.</i> 2000) [54] |
| CHRS CCS                 | 0.25°              | daily               | 2003-2013                   | (Hong <i>et al.</i> 2004) [55]       |
| CHRS CDR                 | 0.25°              | daily               | 2003-2013                   | (Ashouri <i>et al.</i> 2015) [56]    |

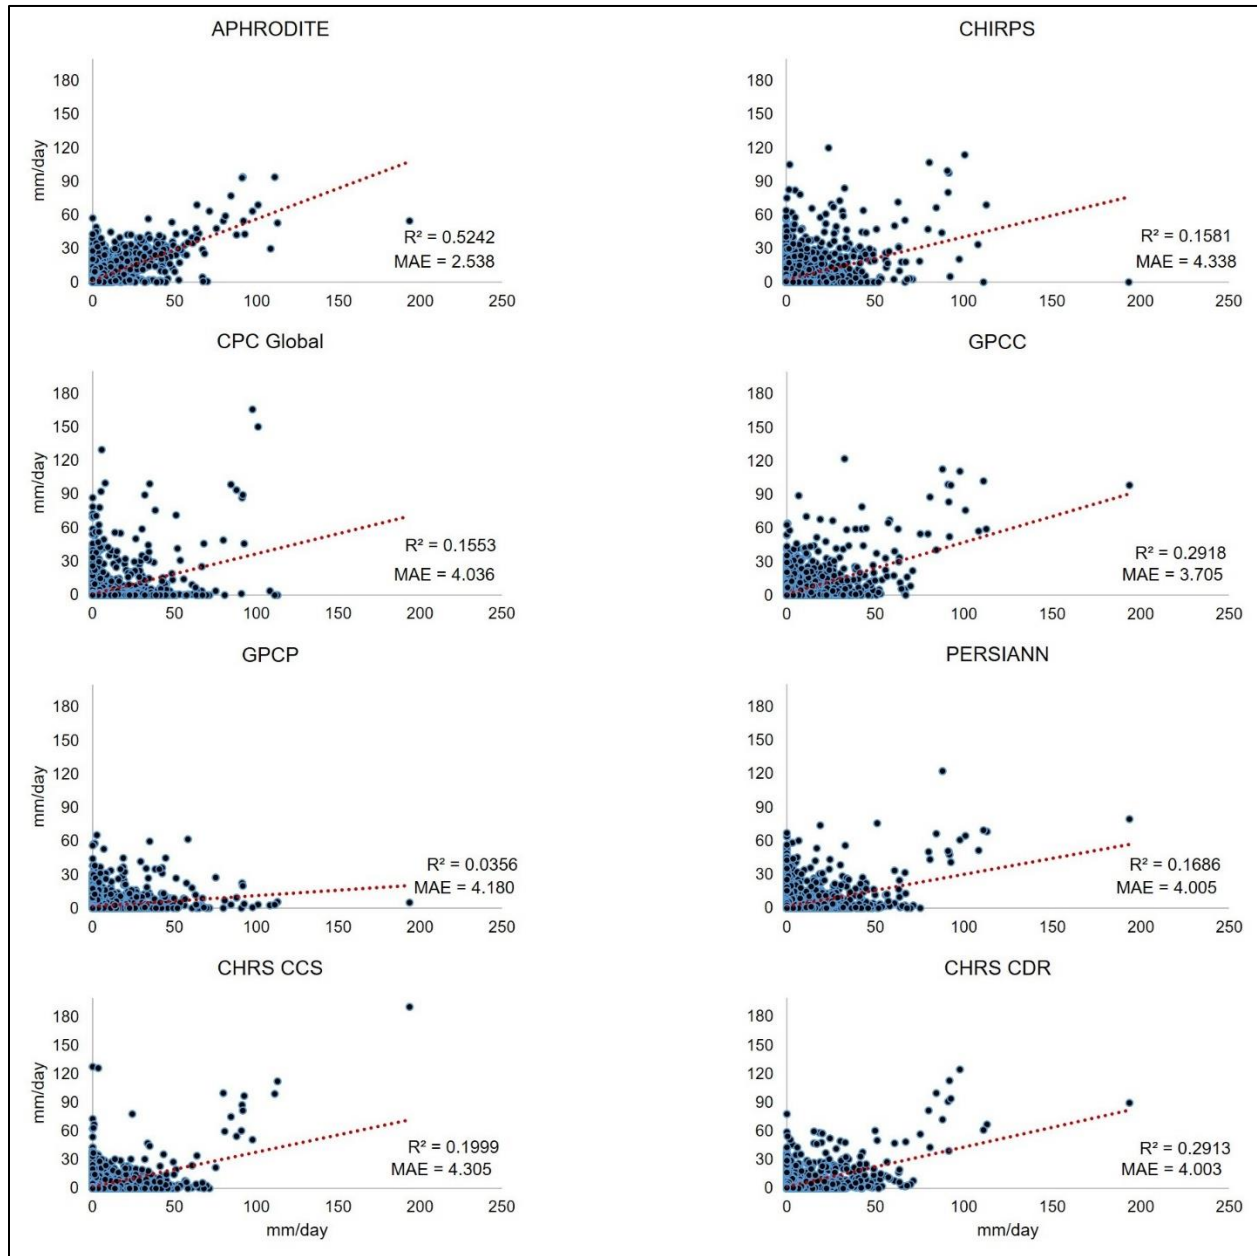

**Figure S1.** Performance of different PPs against gauged precipitation in simulating daily precipitation in Dhoke Pathan sub-catchment.

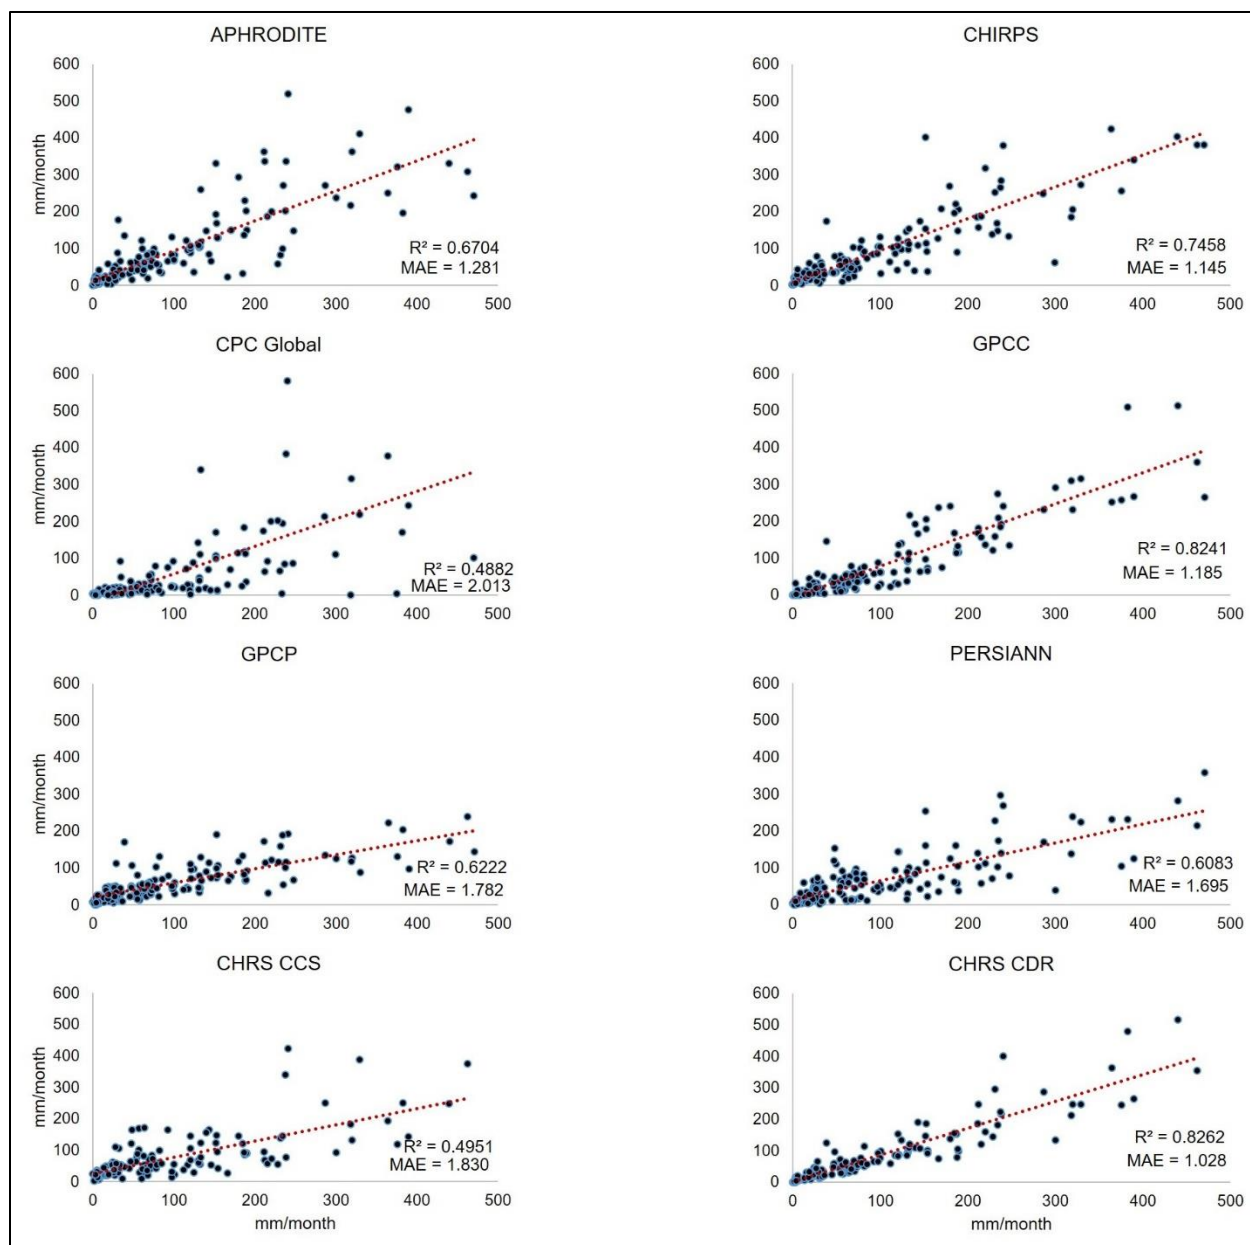

**Figure S2.** Performance of different PPs against gauged precipitation in simulating monthly precipitation in Dhoke Pathan sub-catchment.

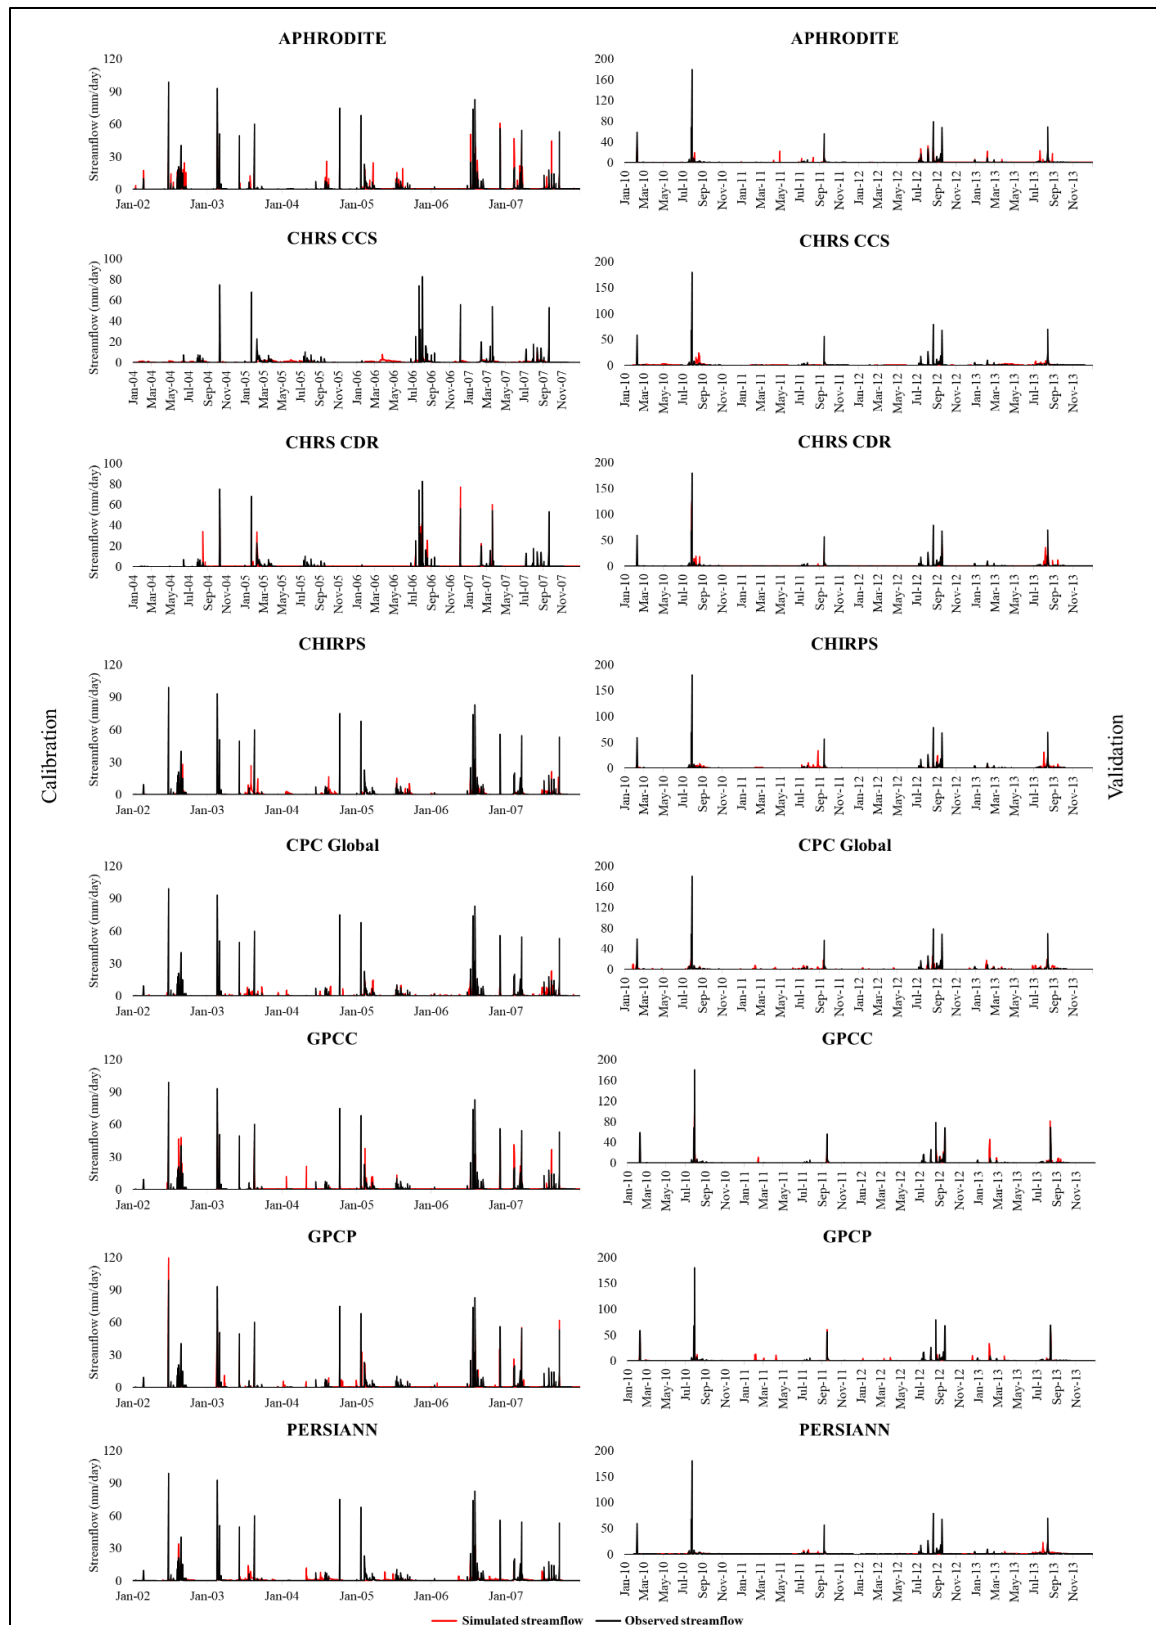

**Figure S3.** Daily streamflow during calibration and validations periods simulated by the HBV-light forced with the precipitation input from eight products in Chirah sub-catchment.

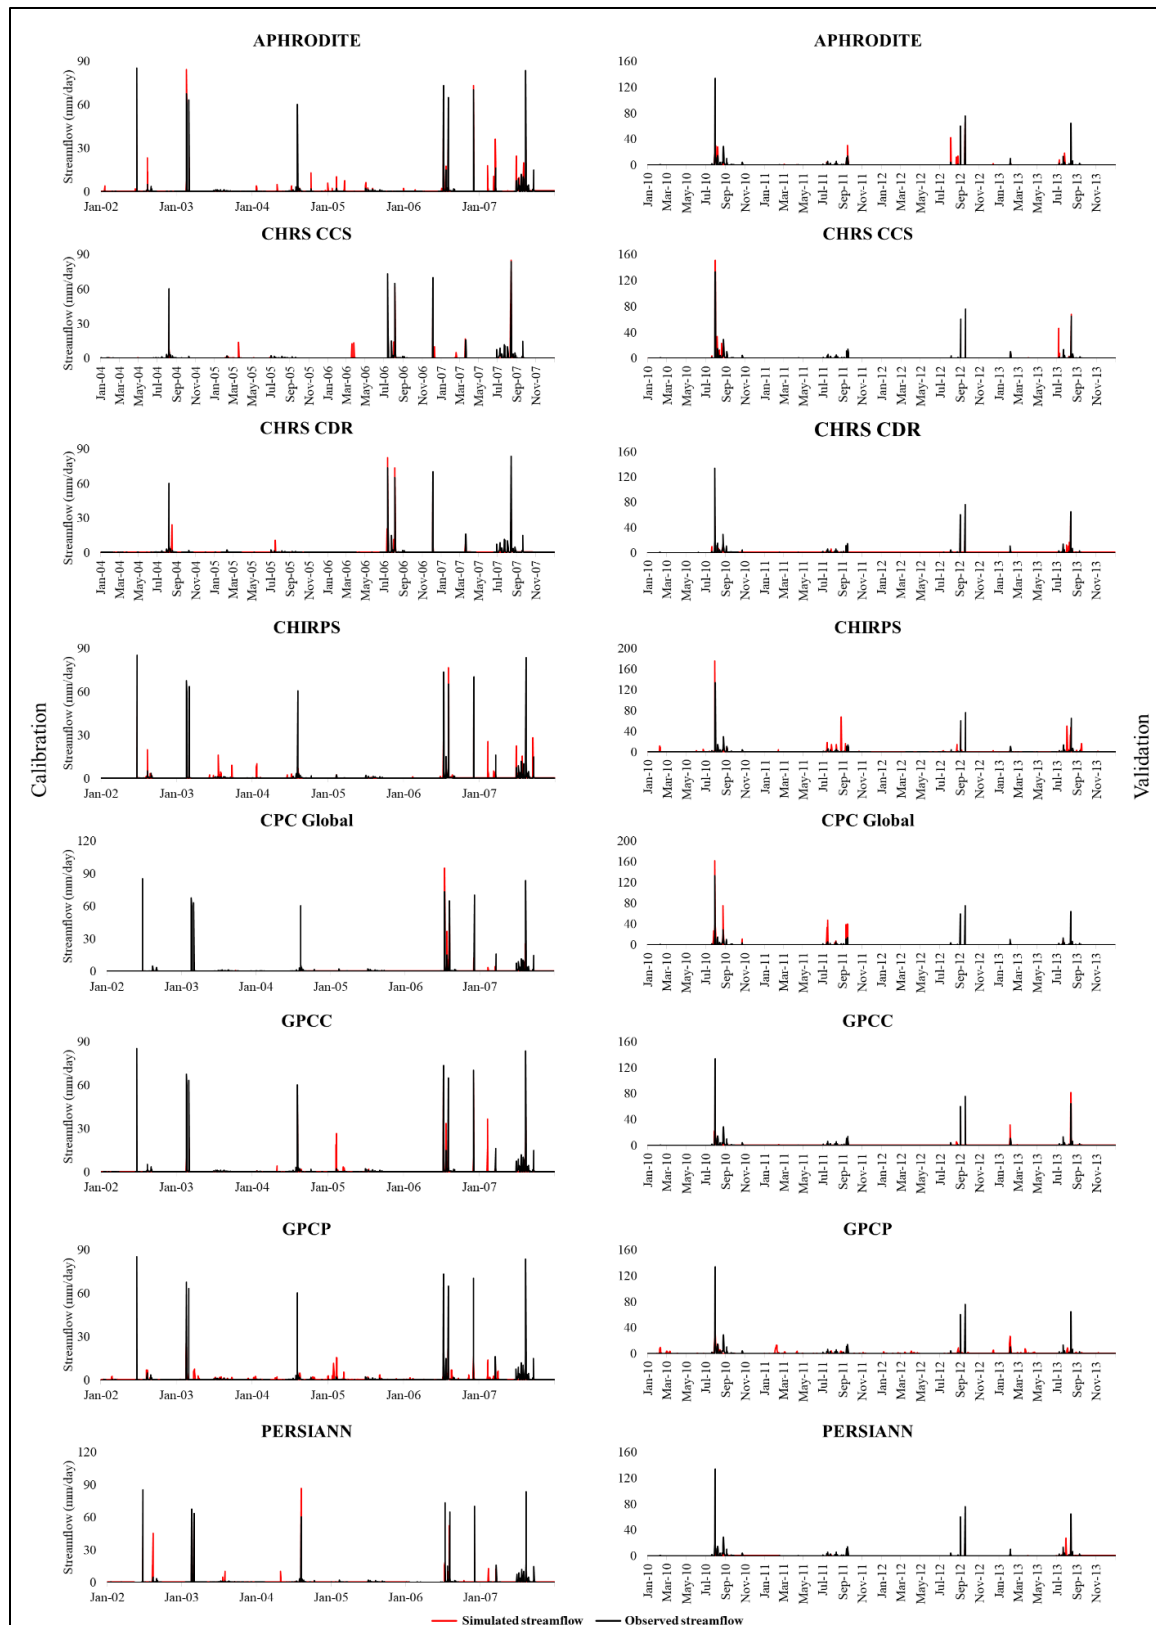

**Figure S4.** Daily streamflow during calibration and validations periods simulated by the HBV-light forced with the precipitation input from eight products in Dhoke Pathan sub-catchment.

**Table S2.** Parameter ranges for optimized performance of the HBV-light during calibration and validation periods with observed precipitation data.

| <b>Parameters</b> | <b>Ranges</b>  | <b>Units</b> |
|-------------------|----------------|--------------|
| PERC              | 18–24          | mm/day*      |
| UZL               | 18–22          | mm           |
| K0                | 0.85– 0.98     | 1/day        |
| K1                | 0.15–0.25      | 1/day        |
| K2                | 0.00001–0.0001 | 1/day        |
| MAXBAS            | 1–1.5          | day          |
| TT                | -1–2           | °C           |
| CFMAX             | 0.5–4          | mm/day °C    |
| SP                | 0.3–0.65       | -            |
| SFCF              | 1–3            | -            |
| FC                | 4–12           | mm           |
| LP                | 0.6–0.9        | -            |
| BETA              | 6.5–8.5        | -            |

\* Day is a unit of time used in this study for model setup and development.
